# Supplementary material for: An Fe·MOF–Mo·POM hybrid material: a novel and efficient catalyst for selective benzyl alcohol oxidation to benzaldehyde
Source: Royal Society of Chemistry journal article supplement (doi:10.1039/d3ce00778b), 2023-01-01
Supplement: d3ce00778b1.pdf [file d3ce00778b1.pdf]

## **Fe.MOF-Mo.POM composite: a novel and efficient catalyst for selective benzyl alcohol oxidation to benzaldehyde**

**Maryam Mohammadikish**<sup>\*a,b</sup>, **Mahsa Panahi**<sup>a</sup>

<sup>a</sup> *Department of Inorganic Chemistry, Faculty of Chemistry, Kharazmi University, 15719-14911, Tehran, Iran*

<sup>b</sup> *Research Institute of Green Chemistry, Kharazmi University, Tehran, Iran*

*Tel./fax: +98 2186072706.*

*E-mail address: mohammadikish@khu.ac.ir*

### **Materials and apparatus**

All chemicals and solvents were purchased from Merck, Sigma-Aldrich, and Alfa Aesar chemical companies without further purification.

Fourier transform infrared (FT-IR) spectra of solid samples were recorded on a Perkin-Elmer-RXI FT-IR spectrometer using KBr disks. Powder X-ray diffraction (XRD) analyses were conducted by Rigaku D-max CIII X-ray diffractometer with Cu K $\alpha$  radiation ( $\lambda = 1.54056 \text{ \AA}$ ). Field emission scanning electron microscopy (FESEM) images and energy dispersive X-ray (EDX) analyses were recorded on a TESCAN-MIRA III-FEG scanning electron microscope. Inductively coupled plasma-optical emission spectrometry (ICP-OES) results were obtained on a SPECTRO ARCOS analyzer. Thermogravimetric analysis (TGA) was performed on a LINSEIS STA PT-1000 thermogravimetric in the temperature range from room temperature to 700 °C at a heating rate of 10°C min<sup>-1</sup> in static air. Micro Active for TriStar II plus 2.03 device was used for nitrogen adsorption-desorption analysis and to determine the specific surface area. X-ray photoelectron spectroscopy (XPS) spectra were ascertained on a Thermo ESCALAB 250 XI with Mg X-ray sources. Gas chromatograph of the samples was recorded on Agilent 6890N equipped with a capillary column (HP-5) and a FID detector.

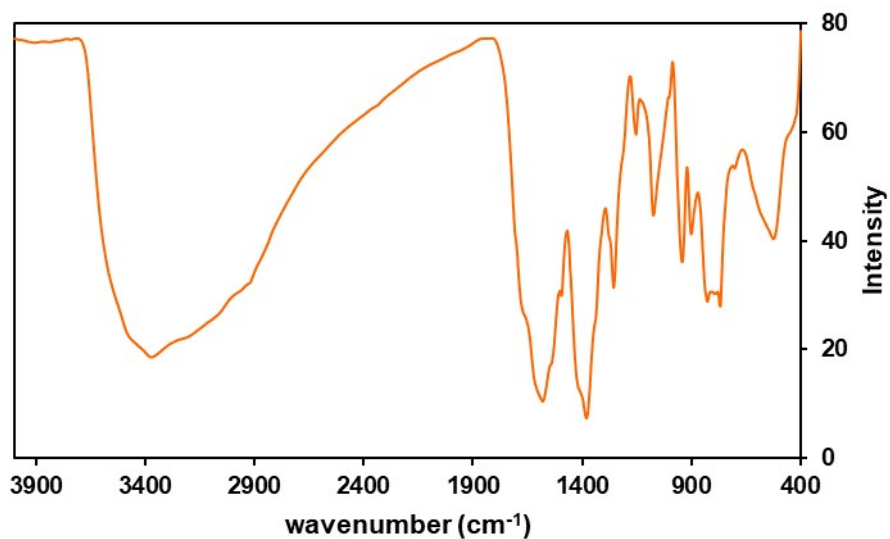

**Figure S1.** FT-IR spectrum of recovered Fe.MOF-Mo.POM after the catalytic reaction.

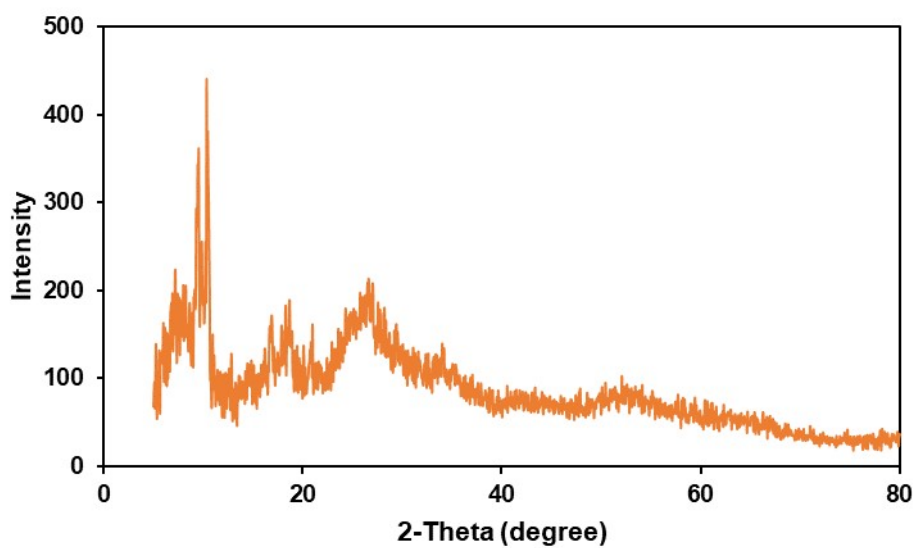

**Figure S2.** XRD pattern of recovered Fe.MOF-Mo.POM after the catalytic reaction.
